# Supplementary material for: Preparation of macroscopic spherical porous carbons@carboxymethylcellulose sodium gel beads and application for removal of tetracycline
Source: Royal Society of Chemistry journal article supplement (doi:10.1039/c6ra14877h), 2016-01-01
Supplement: c6ra14877h1.pdf [file c6ra14877h1.pdf]

## Supporting Information

### **Preparation of macroscopic spherical porous carbons@carboxymethylcellulose sodium gel beads and application for removal of tetracycline**

Jinsong He, Jiangdong Dai, Atian Xie, Sujun Tian, Zhongshuai Chang, Yongsheng Yan \* and Pengwei Huo \*

School of Chemistry and Chemical Engineering, Jiangsu University, Zhenjiang 212013, China

Institute of Green Chemistry and Chemical Technology, Jiangsu University, Zhenjiang 212013, China

Corresponding author. Tel.: +86-0511-88790683; Fax: +86-0511-88791800.

E-mail: E-mail: [yys@mail.ujs.edu.cn](mailto:yys@mail.ujs.edu.cn) (Y. Yan)

[huopw@mail.ujs.edu.cn](mailto:huopw@mail.ujs.edu.cn) (P. Huo)

Table S1 Fitting parameters of intraparticle diffusion model for the adsorption TC on EPCs@CMCS gel beads with different initial concentrations.

| $C_0$<br>(mg L <sup>-1</sup> ) | $k_{id,1}$<br>(g mg <sup>-1</sup> min <sup>-1/2</sup> ) | $C_1$ | $R^2$  | $k_{id,2}$<br>(g mg <sup>-1</sup> min <sup>-1/2</sup> ) | $C_2$ | $R^2$  |
|--------------------------------|---------------------------------------------------------|-------|--------|---------------------------------------------------------|-------|--------|
| <b>50</b>                      | 16.17                                                   | 1.91  | 0.9980 | 1.50                                                    | 37.95 | 0.8300 |
| <b>75</b>                      | 22.92                                                   | 1.28  | 0.9887 | 2.91                                                    | 52.83 | 0.8939 |
| <b>100</b>                     | 27.34                                                   | 0.03  | 0.9910 | 4.13                                                    | 66.85 | 0.7714 |

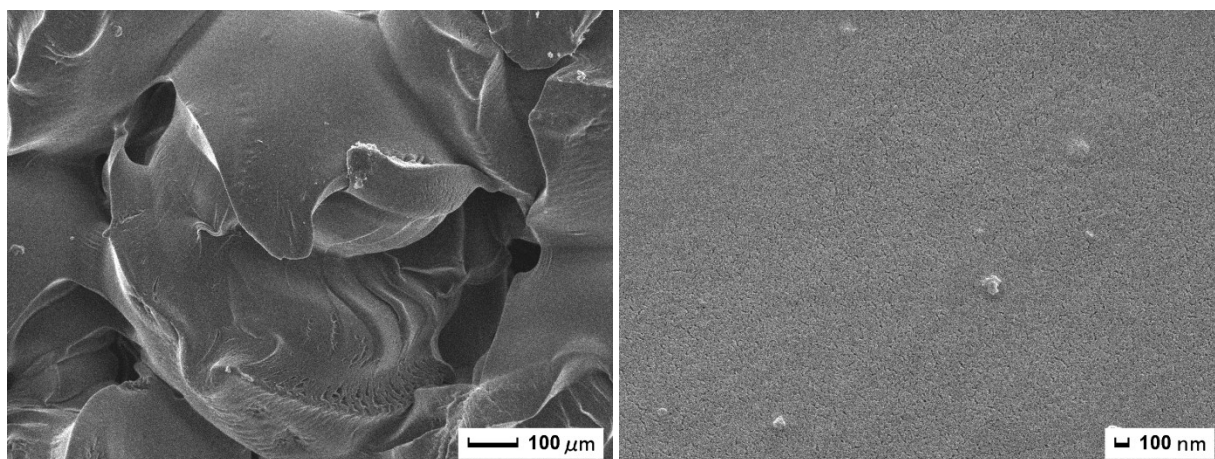

Fig. S1 SEM images of CMCS gel beads.

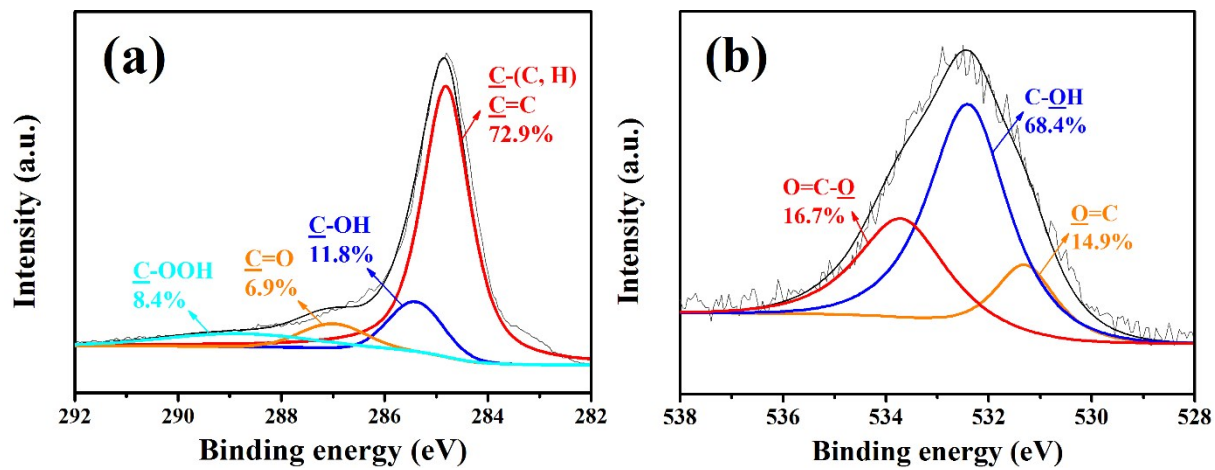

Fig. S2 The high-resolution XPS spectra of C1s (a) and O1s (b) peaks of EPCs.

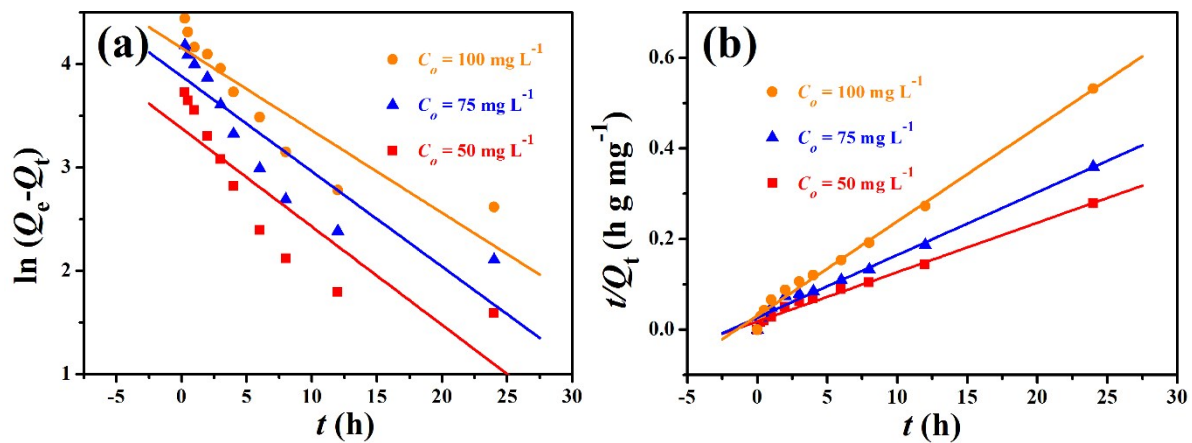

Fig. S3 Liner fitting of pseudo-first-order (a) and pseudo-second-order (b) kinetics of TC on EPCs@CMCS gel beads with different initial concentrations. ( $\text{pH} = 6.0$ ,  $T = 298 \text{ K}$ )

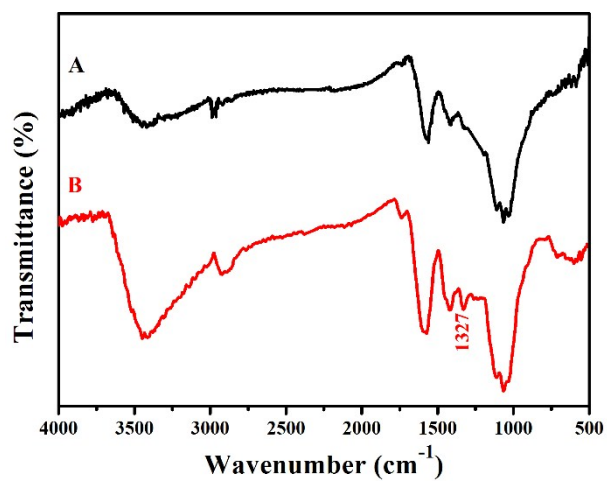

Fig. S4 FT-IR spectra of EPCs@CMCS gel beads before (a) and after (b) adsorption of TC (the first cycle).
